# Supplementary figures and images for: The Expression and Regulation of Adrenomedullin in the Human Endometrium: A Candidate for Endometrial Repair
Source: PubMed Central journal article supplement — Endocrinology. 2011 May 10;152(7):2845–56. doi: 10.1210/en.2010-1256 (PMC3192419; doi:10.1210/en.2010-1256), 2011-05-10

Figure Supp 1

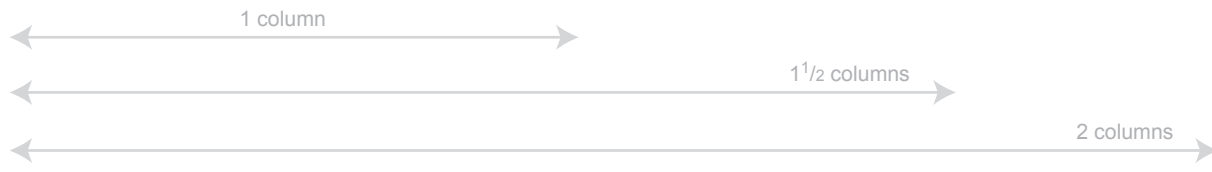

A

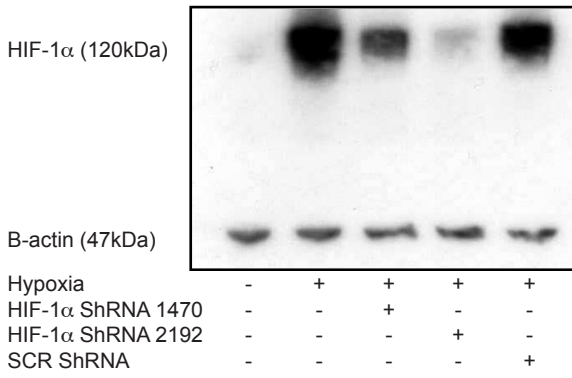

B

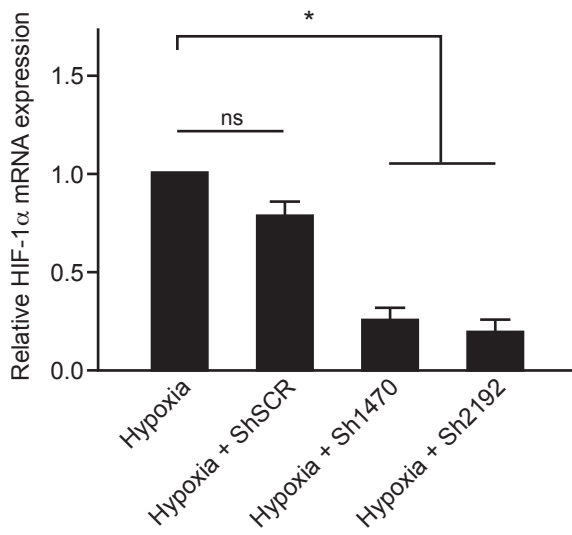

C

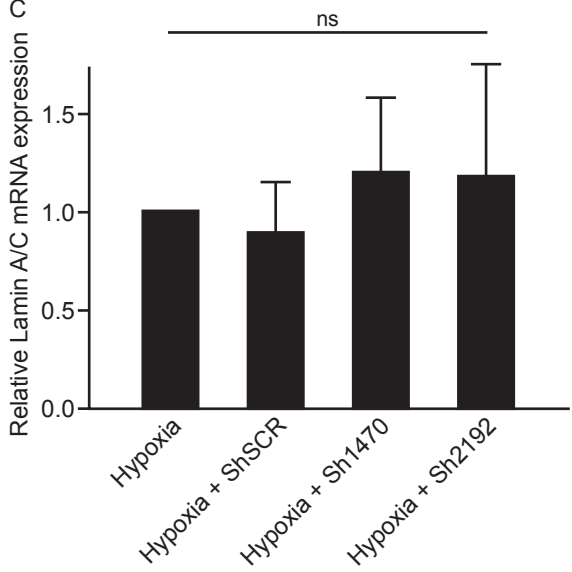

Supplement: supp_en.2010-1256_en-10-1256_Supplementary_Figure_1.pdf [file supp_en.2010-1256_en-10-1256_Supplementary_Figure_1.pdf]
